1 **Methods matter: Influential purification and analysis parameters for intracellular**  
2 **parasite metabolomics**

3 Authors: Maureen A. Carey<sup>1,\*</sup>, Vincent Covelli<sup>2\*%</sup>, Audrey Brown<sup>3</sup>, Jessica G.  
4 Cooper<sup>1&</sup>, and Jennifer L. Guler<sup>2,3,#</sup>

5 \*Co-first authors

6 #Corresponding author: [jlq5fw@virginia.edu](mailto:jlq5fw@virginia.edu)

7

8 Affiliations:

9 1: Department of Microbiology, Immunology, and Cancer Biology, University of Virginia  
10 School of Medicine, Charlottesville, VA, USA

11 2: Division of Infectious Disease and International Health, University of Virginia School  
12 of Medicine, Charlottesville, VA, USA

13 3: Department of Biology, University of Virginia, Charlottesville, VA, USA

14 %Current address: Department of Infectious Diseases, Providence-St. Joseph Health,  
15 Victorville, CA, USA

16 &Current address: Department of Plant and Soil Sciences, University of Delaware,  
17 Newark, DE, USA

18

19

20 ABSTRACT

21 Due to improved instrument sensitivity and access, the use of metabolomics is gaining  
22 traction for the study of many organisms and pathogens. For the intracellular malaria  
23 parasite, *Plasmodium falciparum*, both targeted and untargeted metabolite detection  
24 has improved our understanding of pathogenesis, host-parasite interactions, parasite  
25 response to antimalarials, and impacts of resistance. However, protocols for purification  
26 are not optimized for investigations of intracellular pathogens and noise-limiting analysis  
27 parameters are not well defined. To explore influential parameters, we purified a diverse  
28 set of *in vitro* grown intra-erythrocytic *P. falciparum* parasites for untargeted  
29 metabolomics studies. Following metabolite identification, data processing included  
30 normalization to double stranded DNA, total protein, or parasite number to correct for  
31 different sample sizes and stage differences. We found that parasite-derived variables  
32 were most appropriate for normalization as they separate sample groups and reduce  
33 noise within the data set. However, these post-analysis steps did not remove the  
34 contribution from the host erythrocyte, in the form of membrane rich 'ghosts', and levels  
35 of technical sample variation persisted. In fact, we found that host contamination is as  
36 influential on the metabolome as sample treatment. This analysis also identified  
37 metabolites with potential to be used as markers to quantify host contamination levels.  
38 In conclusion, purification methods and normalization choices during the collection and  
39 analysis of untargeted metabolomics heavily affect the interpretation of results. Our  
40 findings provide a basis for development of improved experimental and analytical  
41 methods for future metabolomics studies of *P. falciparum* and other intracellular  
42 organisms.

43 **Importance:** Molecular characterization of pathogens, such as the malaria parasite, can  
44 lead to effective treatment strategies and improved understanding of pathogen biology.  
45 However, the distinctive biology of the *Plasmodium* parasite, such as its repetitive  
46 genome and requirement of growth within a host cell, hinders progress towards this  
47 goal. Untargeted metabolomics is one promising approach to learn about pathogen  
48 biology and how it responds to different treatments. By measuring many small  
49 molecules in the parasite at once, we gain a better understanding of important pathways  
50 that contribute to this response. Although increasingly popular, protocols for parasite  
51 isolation from the host cell and various analysis options are not well explored. The  
52 findings presented in this study emphasize the critical need for improvements in these  
53 areas to limit misinterpretation due to host metabolites and correct for variations  
54 between samples. This will aid both basic biological investigations and clinical efforts to  
55 understand important pathogens.

56

## 57 **Introduction**

58 Malaria continues to be responsible for hundreds of thousands of deaths annually, most  
59 of which result from infection with the protozoan parasite, *Plasmodium falciparum* (1).  
60 Characterization of the biology of this important pathogen can lead to improved  
61 treatment strategies. The molecular mechanisms behind interesting *P. falciparum*  
62 phenotypes are challenging to understand due to a lack of traditional methods of  
63 investigation in this organism, such as forward and reverse genetics. Unbiased 'omics  
64 approaches (transcriptomics and proteomics) are widely used but the limited annotation  
65 of the parasite genome makes these data sets challenging to interpret. One way to

66 alleviate this lack functional knowledge is to use network-based modeling to facilitate  
67 data interpretation (2). Additionally, the measurement of direct mediators of the  
68 phenotype, such as metabolite reactants and products of enzymatic reactions, can  
69 improve our ability to make predictions about cellular function under certain conditions.  
70 For this reason, metabolomics is becoming increasingly popular to study *P. falciparum*  
71 (3-12). These studies have allowed for a greater understanding of malaria pathogenesis  
72 (13), strain-specific phenotypes (11), and host-parasite interactions (9). Although  
73 metabolomics can successfully identify metabolic signatures that correlate well with  
74 biological function, such as time- and dose-dependent response to antimalarial  
75 treatment (3, 5) and resistance-conferring mutations (12), there are distinct challenges  
76 that need to be considered when performing metabolomic studies in *P. falciparum*.

77 Challenges such as host contamination, limited parasite yield, and parasite  
78 stage-specificities arise due to certain properties of this organism (see **Table 1**). For  
79 example, experimental samples typically have few parasites and abundant host  
80 material. One contributing factor is that parasitemias are limited during *in vitro* culture  
81 and clinical infections (<5% or five infected erythrocytes per 100 total (14, 15)).  
82 Additionally, *P. falciparum* is an intracellular parasite during the asexual cycle in the  
83 human blood stream; the host erythrocyte accounts for up to a 10-fold more cellular  
84 material over early state parasites (16, 17). Due to our ability to enrich for late stage  
85 parasites using magnetic purification (18), the study of the larger later stage parasite  
86 has historically allowed for efficient genomic, transcriptomic and proteomic analysis of  
87 parasite biology. These stages have typically been thought of as more metabolically  
88 active than the early stage parasites due to increased activity of well-studied cellular

89 pathways, including robust hemoglobin degradation (19), nuclear genome replication,  
90 and protein synthesis (20, 21). The study of the smaller early stage of the parasite is  
91 particularly hard to achieve due to difficulty isolating adequate amounts of parasite  
92 material as a result of few effective enrichment methods (22). Thus, studies must be  
93 designed in a manner to overcome these challenges, limiting sample-to-sample  
94 variation and optimizing metabolite recovery (i.e. total number of metabolites detected).

95 In this study, we sought to define critical parameters that would help overcome  
96 these challenges and allow the collection of high quality metabolomics data. We show  
97 that diverse sample groups can be differentiated, but the choice of analytic parameters  
98 for data processing and host cell contamination both heavily influence the parasite  
99 metabolome. In particular, we investigated normalization approaches to assess the  
100 impact of host contamination and found that the adjustment to parasite-derived  
101 variables better remove sample noise. However, even appropriate normalization fails to  
102 remove host noise completely, as host contamination is as influential on metabolome as  
103 sample treatment. Thus, we propose that the combination of improved purification and  
104 analytic parameters will generate more accurate measures of the metabolome,  
105 increasing the utility of unbiased metabolomics to investigate intracellular parasite  
106 biology.

107

## 108 **RESULTS**

### 109 Parasite sample groups are metabolically distinct

110 To ensure our metabolomics approach can identify obvious differences in sample  
111 groups, we compared parasite groups that differed in stage, origin, and growth

112 conditions (**Fig. 2A**). Distinct purification procedures were used for preparation of each  
113 sample group (see *Materials and Methods* and **Fig. 1**), resulting in different amounts of  
114 parasite material (**Fig. 2B, Table S1**). Replicates of sample group 1, which were merely  
115 lysed from host cells with a mean parasitemia of 1.14%, contained between  $1.3\text{-}6.9 \times 10^6$   
116 total parasites. Sample group 2 was enriched for late stage parasites using  
117 magnetic purification to a mean parasitemia of 53.6% (**Table S1**). These replicates  
118 contained between  $4.7 \times 10^7$  to  $6.7 \times 10^8$  total parasites (up to 100-fold more individual  
119 parasites). Despite these differences, mean protein abundance was insignificantly  
120 different across replicates of each sample group and was more variable in sample  
121 group 2 (group 1 SD: 12.7, group 2 SD: 38.2, see supplementary information for code  
122 and **Fig. 2B**). Sample group 1 had a mean of 115.3  $\mu\text{g/ml}$  of protein, and sample group  
123 2 had a mean value of 107.6  $\mu\text{g/ml}$ . Cell number and DNA abundance are positively  
124 correlated, as expected ( $r = 0.8037$ ,  $p\text{-value} = 0.00002$ , **Fig. 2B**); these values are not  
125 perfectly correlated because the late stage parasites in sample group 2 are actively  
126 replicating DNA, and, thus, have increased and variable genome copy number per cell.  
127 Protein does not correlate with parasite number or DNA abundance (data not shown,  
128 see supplementary information for code).

129 We conducted metabolomics on the samples described above (**Fig. 1**). Cultured  
130 parasites were lysed from host erythrocytes and analyzed via UPLC-MS. In comparison  
131 1, we detected 375 total metabolites that were annotated by Metabolon, Inc.; 143 of  
132 these were detected in every sample and represented 10 energy associated  
133 metabolites, 159 lipid species, 108 peptides and amino acids, 40 nucleotides, 28  
134 cofactors, 20 carbohydrates, and 10 others (**Fig. 2C**). Samples from group 1 contained

135 between 182-242 metabolites while those from group 2 contained between 267-368  
136 metabolites (**Fig. 2C**). Fifteen metabolites are found in every group 1 sample, but not all  
137 group 2 samples, and 111 metabolites are found in every group 2 sample but not all  
138 group 1 samples. Thus, distinct samples, due to parasite origin, stage, growth  
139 conditions, and purification differences, have distinct metabolomes.

140

#### 141 Normalization parameters influence sample variation

142 Normalization methods can influence results (23), but have not been explored in the use  
143 of metabolomics for *Plasmodium* nor other intracellular pathogens. To explore the  
144 importance of various normalization approaches, we performed principal component  
145 analysis with all sample metabolomes using either unnormalized data or three  
146 normalization methods: quantification of parasite number, double stranded DNA, and  
147 total protein amount. Each normalization method yields distinct principle component  
148 structures and clearly separates sample groups (**Fig. 2D**). In all cases, principle  
149 component (PC) 1 primarily represents *between* group variation, and PC2 represents  
150 *within* group variation (**Fig. 2D**). Without normalization, PC 1 and 2 summarize 78.4% of  
151 sample variation. These principal components from parasite number and DNA  
152 normalization summarize 87.7 and 80.6% of sample variation, respectively. With protein  
153 normalization, 79.1% of variation is summarized. PC2 tends to separate sample group 1  
154 better than those samples within group 2 (**Fig. 2D**).

155 The metabolites that most contribute to group or sample variation are not the  
156 same with each normalization approach (**Table S2**). Thus, metabolome differences  
157 between groups are dependent on normalization approach. Yet, there are several

158 striking trends across analyses. For example, the PC structure following protein  
159 normalization closely mimics that of the unnormalized data and, similar metabolites  
160 contribute to PC1 and PC2 in both analyses. Sphingomyelin species contribute to within  
161 group variation (PC2), and orotidine and dipeptides contribute to between group  
162 variation (PC1; **Table S2**). Upon DNA or parasite number normalization, phenylalanine,  
163 tryptophan, leucine, putrescine, and sedoheptulose 7-phosphate contribute to PC2, or  
164 within group variation (**Table S2**). Contrary to protein amount (see *Discussion*), DNA  
165 and parasite number normalization are parasite-derived and, thus, these two  
166 measurements are preferable for normalization. The choice of which parasite-derived  
167 variable to use for normalization should be based on the experimental question.  
168 Accordingly, we normalize to parasite number during our subsequent comparison of  
169 sample groups 1 (early stage) and 2 (late stage; see **Fig. 2**); normalization to DNA  
170 amount would not be appropriate because these different stages have known genome  
171 copy number differences (late stage parasites are actively replicating their DNA,  
172 whereas ring stage parasites are haploid). Furthermore, we normalize to DNA content  
173 during our subsequent comparison within a group (i.e. replicates of samples group 1,  
174 see **Fig. 3**). In this case, normalization to this parasite variable is more appropriate  
175 because these measurements are collected immediately prior to mass spectrometry  
176 metabolite processing (**Fig. 1**) in our experimental design and are the most  
177 representative of analyzed samples.

178

179 Remnants of the erythrocyte host contribute to metabolite pool

180 Beyond comparing the metabolomes of artificially distinct samples groups, we explored



181 the metabolic changes induced by antimalarial treatment. We collected metabolomics  
182 from treated and untreated early stage parasites that were identical in growth conditions  
183 and purification approach, and were matched for blood batch (**Fig. 3A, Table S1**, see  
184 *Materials and Methods* for group 1). Following data processing, the metabolomes of  
185 antimalarial treated and untreated parasites fail to cluster via PCA (**Fig. 3B**).  
186 Accordingly, univariate statistical analysis revealed no differentially abundant  
187 metabolites between treated and untreated samples (see supplemental information for  
188 code).

189 When considering possible explanations for this result, microscopy revealed that  
190 parasites lysed from host cells remain embedded in erythrocyte membranes and  
191 washes fail to isolate parasite material (**Fig. 3C**). This result emphasized that  
192 erythrocyte 'ghosts' (cell membranes with associated metabolites) remain abundant in  
193 the sample and heavily contribute to the metabolome (see *Discussion*). In fact,  
194 univariate statistical analysis only revealed one metabolite with increased abundance in  
195 one blood batch (1-arachidonoyl-GPE; see supplemental information for code). Thus,  
196 the metabolome is likely influenced by both blood batch and antimalarial treatment, with  
197 the noise induced by each variable overshadowing group differences.

198 To further explore the host contribution to the metabolome, we built two Random  
199 Forest classifiers to identify metabolites that are associated with either erythrocyte  
200 ghosts or antimalarial treatment. We first built a classifier to predict blood batch in early-  
201 stage parasites (**Fig. 3A**). These samples likely have large host contribution due to the  
202 inability to enrich for erythrocytes infected with early stage parasites. Ninety-five  
203 metabolites (of 298), including AMP, ADP-ribose, aspartate, and sphingosine improved

204 classifier accuracy in predicting blood batch (most influential depicted in **Fig. 3D**, see  
205 supplemental information for code); the remaining metabolites had no effect on  
206 classifier performance or worsened its predictive capabilities, indicating they are not  
207 associated with blood batch due to high variability or association with other features that  
208 differentiate samples. This classifier predicted blood batch with a 30% error rate. Thus,  
209 a subset of the measured metabolome was predictive of blood batch.

210 To determine if blood batch is as influential on metabolome as antimalarial  
211 treatment, we built a similar classifier to predict treatment within early stage samples  
212 (**Fig. 3A**). Early stage parasites were classified into two treatment conditions with a 30%  
213 class error rate. One hundred and eighteen metabolites (of 298) improved classification  
214 accuracy (see most influential in **Fig. 3E**, and supplemental information for code),  
215 including pipecolate and several dipeptides. Thus, sample metabolome can classify  
216 both blood batch and sample group, indicating sample treatment and blood batch  
217 influence the metabolome.

218

## 219 **DISCUSSION**

220 Here, we explore metabolomics methods used in *in vitro* study of intraerythrocytic *P.*  
221 *falciparum*. The parasite's intracellular lifestyle introduces challenges in implementing  
222 traditional protocols, predominately due to limited amounts of parasite material and host  
223 metabolite contamination. In our study, we sought to determine critical parameters for  
224 the collection of high quality metabolomics data despite these challenges. In particular,  
225 we investigated normalization approaches and conducted a detailed assessment of the  
226 impact of host contamination. Overall, we found that only parasite-derived variables are

227 best suited to use during normalization. Despite these analytic approaches, host noise  
228 permeates the analysis, as host contamination is as influential on metabolome as  
229 antimalarial treatment. Thus, improvements in both purification and analytic parameters  
230 must be combined to generate accurate metabolomes and increase our ability to learn  
231 more about the parasite's biology.

232 Normalization of metabolite levels aims to limit technical or non-biological  
233 variation, thus enhancing interpretation of results. Normalization can be calculated by a  
234 variety of methods and is implemented either before or after analysis (**Table 1** (24, 25)).  
235 Often, pre-analysis normalization is conducted by isolating the same number of cells for  
236 analysis (26) but this is not typically used in the study of *P. falciparum* as generating  
237 adequate biomass can be challenging. Furthermore, sample adjustments following the  
238 use of inaccurate quantification methods may introduce more variability. Post-analysis  
239 normalization methods are also routinely used; these include the use of internal  
240 standards (25, 27), corrections for protein amount (often used for supernatant or cell-  
241 free metabolomics (28)), DNA content (an approach validated in mammalian cells (29)),  
242 or cell number (typically used for bacterial populations (30)). A common approach used  
243 in the study of *P. falciparum* involves an uninfected erythrocyte control to adjust for the  
244 presence of host metabolites (7, 10, 27, 31-33). However, use of this control without  
245 other forms of normalization led to the misattribution of host metabolites to the parasite  
246 (34). Selecting the correct method of normalization in *P. falciparum* metabolomics  
247 studies is essential to ensure that parasite-derived metabolites, and not host-derived  
248 metabolites, are measured and interpreted to make conclusions.

249 We explore three post-analysis normalization approaches: protein, DNA, and

250 parasite number. We argue the host erythrocyte heavily contributes to protein  
251 abundance, and, thus, this metric is not solely parasite-derived. In our analysis, this was  
252 most clearly observed when comparing protein abundances between our sample  
253 groups (**Fig. 2B**). We expected a proportional increase in protein amount as parasite  
254 size increases throughout the intraerythrocytic life cycle (from sample group 1 to 2; early  
255 to late stage); however, this increase was not detected, implicating host erythrocyte  
256 contribution. Furthermore, heavy host contamination explains the observations that 1)  
257 there is an increased level of protein variability in group 2 (explained by the wider range  
258 in parasitemia level and thus host erythrocyte contribution, **Table S1**), 2) host/media  
259 metabolites such as kynurinine, phenol red, and HEPES were detected in this analysis  
260 (see below and supplemental data), and 3) protein normalization minimally changes the  
261 PCA data structure and top contributing metabolites (**Fig. 2D** and **Table S2**).

262 In sharp contrast, total DNA amount and parasite count are entirely parasite-  
263 derived; mature uninfected erythrocytes are anucleated, without detectable DNA (35),  
264 and are excluded when determining parasite count (see *Materials and Methods*). When  
265 metabolites were evaluated following DNA and parasite count normalization, more  
266 nuclear material and total parasites were observed in later stages (group 2, **Fig. 2B**).  
267 These data are not surprising, as late-stage parasites are known to amplify DNA  
268 content up to twenty times during their asexual life cycle (36). A greater cell count in late  
269 stage samples can be attributed to the higher parasitemia that is achieved through  
270 magnetic purification of late stage trophozoites and schizonts (37). To our knowledge,  
271 normalization to parasite-derived material has not been described in detail in previous  
272 metabolomics studies of *P. falciparum*. We propose that similar to studies in *Leishmania*

273 (38-40), normalization to parasite-derived measurements should become standard  
274 during metabolomics analysis of these intraerythrocytic parasites (**Table 1**).

275       Clearly, parasite-to-parasite sample variation can influence metabolomics data,  
276 but we also found host erythrocyte material can heavily impact a sample's metabolome.  
277 Many studies employ erythrocyte lysis prior to sample purification ((8, 32) and our  
278 current study, see *Materials and Methods*). However, this approach does not eliminate  
279 the potential for host contamination; host membrane fragments devoid of internal  
280 components, colloquially referred to as erythrocyte "ghosts," remain in purified samples  
281 (**Fig. 3C**). Despite this concerted effort to limit host metabolites through lysis, our  
282 studies support heavy erythrocyte contribution to the *P. falciparum* metabolome.  
283 Several metabolites were detected in group 1 and 2 metabolomes that have not  
284 previously been measured as produced or consumed in *Plasmodium*. For example,  
285 kynurenine is known to be present in erythrocytes and is derived from the amino acid L-  
286 tryptophan (41, 42). Although no known production or consumption has been reported  
287 in the parasite, kynurenine was detected in 13 of our 30 samples, most frequently in the  
288 group 2 (late stage parasites, see supplemental data). This finding indicates some  
289 metabolites may be from the host, not the parasite, or the parasite has greater  
290 metabolic capabilities than previously understood. Similarly, media components such as  
291 phenol red (phenolsulfonphthalein) and HEPES (4-(2-hydroxyethyl)-1-  
292 piperazineethanesulfonic acid) were measured in parasite metabolomes (see  
293 supplemental data). Neither are produced or consumed by the parasite but likely  
294 remained associated with our cells following *in vitro* culture in media that contains these  
295 metabolites (i.e. RPMI, see *Materials and Methods*). The abundance of phenol red and

296 HEPES, as well as cholesterol (a metabolite excluded from parasite membranes (43,  
297 44)) are correlated prior to normalization, and these correlations persist following  
298 normalization. Moreover, phenol red contributed to the accuracy of our antimalarial  
299 treatment classifier, further confirming that blood batch effects influenced the dataset.  
300 Lastly, lipid species were the major class of metabolites detected in our analysis (**Fig.**  
301 **2C**) and contributed heavily to PC2 from un- and protein-normalized data sets (**Table**  
302 **S2**), perhaps due to the remaining erythrocyte membranes. These results add to the  
303 overwhelming evidence of host cell and media contamination in untargeted  
304 metabolomics studies of parasites.

305         Following these observations, we also explored the effect of different blood  
306 batches on metabolome measurements. Because generating sufficient *Plasmodium*  
307 biomass for adequate biological replicates is time-intensive, many experiments require  
308 multiple batches of human blood donations. To avoid batch effects, we controlled blood  
309 batches across sample groups (**Table S1**). Prior to these studies, we predicted that the  
310 blood batch would have some effects on the metabolome; we did not anticipate,  
311 however, that it would be as influential as known stressors, like treatment with  
312 antimalarials with established metabolic effects (3, 5). Several results from our analysis  
313 support this observation. First, samples from either treatment group did not cluster via  
314 PCA (**Fig. 3B**). Second, we detected none-to-few metabolites whose levels were  
315 significantly different between conditions (zero between with and without antimalarial  
316 treatment and 1 between various blood batches). Lastly, classifiers from both treatment  
317 and blood batch predicted samples with equal accuracy (30% error rate, top predictive  
318 metabolites displayed in **Fig. 3D** and **E**). Overall, from these analyses, we concluded

319 that sample-to-sample variation exceeded variation associated with either group. We  
320 also found 1-arachidonoyl-GPE to be significantly different in abundance across blood  
321 batches, which can be explored as a potential biomarker of host contamination. To  
322 expand on this idea, we were also able to predict a set of metabolites that are most  
323 likely to be host erythrocyte-derived (or influenced by host environment) by identifying  
324 the metabolites that are most predictive of blood batch (**Fig. 3D**). Additional  
325 investigations are required since these metabolites may be parasite-derived but only  
326 produced when they are in particular environments (e.g. blood batches). Going forward,  
327 it may be possible to use these metabolites to quantify host cell contribution to  
328 metabolome and assess parasite sample purity or control for host contamination during  
329 analysis.

330 Overall, the methodology and findings from the current study provide a basis for  
331 the use of more streamlined *in vitro* metabolomics approaches for the future  
332 investigation of *P. falciparum* biology. We suggest a set of considerations and  
333 recommendations for enhancing the accuracy parasite metabolomics (presented in **Fig.**  
334 **1 Table 1, and below**). First, samples must be better purified away from host material.  
335 Enrichment methods, whether novel or standard, should be used to increase  
336 parasitemia, reducing the number of uninfected host cells. Second, markers of host  
337 contamination must be used to evaluate the level of host contamination and resulting  
338 data. Our studies suggest that visual detection of ghost material (via microscopy)  
339 combined with assessment of host-specific metabolite markers is an effective option to  
340 assess sample purity. Finally, data must be normalized to parasite-derived  
341 measurements to limit remaining host contamination. With these considerations,

342 metabolomics has the potential to be a powerful tool in the study of intracellular  
343 parasites, like *Plasmodium*.

344

## 345 **MATERIALS AND METHODS**

### 346 **Parasite Cultivation**

347 Laboratory-adapted *P. falciparum* lines were cultured in RPMI 1640 (Roswell Park  
348 Memorial Institute medium, Thermo Fisher Scientific, Waltham, MA) containing HEPES  
349 (Sigma Aldrich, St Louis, MO) supplemented with either 0.5% AlbuMAX II Lipid-rich  
350 BSA (Sigma Aldrich, St Louis, MO) and 50 mg/L hypoxanthine (Thermo Fisher  
351 Scientific, Waltham, MA) (referred to as AlbuMAX media) or 20% v/v pooled human  
352 plasma for generation of complete RPMI (referred to as cRPMI). Parasite cultures were  
353 maintained at 3% hematocrit and diluted with human red blood cells (blood batch noted  
354 in **Table S1**) to maintain parasitemia between 1-3%, with change of culture medium  
355 every other day (**Fig. 1; Step 1**). Cultures were incubated at 37°C with 5% oxygen, 5%  
356 carbon dioxide and 90% nitrogen (14). Some samples were treated with antimalarials  
357 with metabolic effects to maximize differences between groups (see below and  
358 Antimalarial treatment in **Table S1**).

### 359 **Parasite Isolation**

360 For isolation of sample group 1, two distinct laboratory-adapted clinical isolates of *P.*  
361 *falciparum* (BEI Resources, NIAID, NIH: *Plasmodium falciparum*, Strain IPC 4884/MRA-  
362 1240 and IPC 5202/MRA-1238, contributed by Didier Ménard) containing mixed stages  
363 with >50% rings were synchronized using 5% sorbitol (Sigma Aldrich, St Louis, MO)  
364 (45). The resultant early stage cultures were incubated at 37°C in AlbuMAX media to



365 allow for the development of a schizont predominant population (see *Parasite*  
366 *Cultivation* above). After the late stage population was confirmed using microscopy,  
367 cultures were checked every one to two hours for the development of newly invaded  
368 ring stage parasites. If the parasites were treated with antimalarials, it was performed at  
369 this stage. Fourteen flasks containing early ring-stage parasites (<3 hours post invasion)  
370 were subsequently lysed from the erythrocyte membrane using 0.15% saponin, as  
371 previously described (46) (**Fig. 1; Step 3**). Prior to lysis, sampling of parasite material  
372 was taken for determination of erythrocyte count (hemocytometer) and parasitemia  
373 (SYBR-green based flow cytometry (47)), which contributed to parasite number  
374 determination (total erythrocytes x % parasitemia yields total parasites). Additional  
375 samples were obtained following erythrocyte lysis for protein quantification using  
376 Bradford reagent (Sigma Aldrich, St Louis, MO). A series of three wash steps were  
377 then performed using 1X PBS (Sigma Aldrich, St Louis, MO) using centrifugation at  
378 2000 x g to remove soluble erythrocyte metabolites. Purified material was kept on ice  
379 until flash frozen using liquid nitrogen, followed by storage at -80°C until sent for  
380 analysis. This procedure was performed five times for each parasite line to provide 10  
381 replicates for group 1 metabolomic analysis. Additionally, matched parasites (same  
382 parasite lineage, media type, stage, blood batches, and purification methods) were also  
383 grown without drug treatment (**Table S1**) to generate 10 additional samples for group 1  
384 untreated (see second comparison in **Fig. 3**).

385 For isolation of sample group 2, two Dd2-derived laboratory-adapted clones of *P.*  
386 *falciparum* (courtesy of Pradip Rathod, University of Washington, continuously cultured  
387 in the presence of antimalarial, **Table S1**) first underwent an initial sorbitol

388 synchronization step as above. The resultant early stage parasites were then incubated  
389 at 37°C in cRPMI to allow for the successful transition of *P. falciparum* to the late  
390 trophozoite and schizont stages, occurring 24 to 30 hours after initial synchronization.  
391 Next, this predominantly late stage population was enriched through magnetic  
392 purification using a MACS quad-magnet and MACS multistand (Miltenyi Biotech,  
393 Bergisch Gladbach, Germany), as previously described (18) (**Fig. 1; Step 2**). Briefly,  
394 parasite cultures were passed through LS columns with attached sterile syringe needles  
395 (BD Biosciences, San Jose CA) at a rate of 2-3 seconds per drop. A series of two to  
396 three column washes were performed with 5 ml of warmed cRPMI. To elute the desired  
397 material, the column was removed from the magnet prior to adding 5 ml of cRPMI.  
398 Column flow-through from 5 flasks containing late stage parasites was allowed to  
399 recover in cRPMI for 30 min at 37° C prior to saponin lysis, as described above (**Fig. 1;**  
400 **Step 3**). Determination of parasite count and protein quantification, as well as  
401 subsequent sample washing and freezing, were performed as described above for  
402 sample group 1. This procedure was performed five times for each parasite line to  
403 provide 10 samples for group 2 metabolomic analysis.

#### 404 **Metabolite Preparation, Analysis, and Identification**

405 Metabolites were identified using Ultrahigh Performance Liquid Chromatography-Mass  
406 Spectroscopy (UPLC-MS) by Metabolon, Inc. (Durham, NC). All sample preparations  
407 and metabolite identifications were performed according to Metabolon, Inc, standard  
408 protocols. Briefly, double stranded DNA was quantified in all samples using the Quant-it  
409 Picogreen dsDNA Assay Kit (Thermo Fisher, Waltham, MA) according to the  
410 manufacturer's instructions and proteins were precipitated with methanol and

411 centrifuged for extraction (**Fig. 1; Step 4**). Sample extracts were dried and reconstituted  
412 in solvents containing standards (see below) at fixed concentrations to ensure injection  
413 and chromatographic consistency. Waters AQUITY ultra-performance liquid  
414 chromatography (UPLC) and Thermo Scientific Q-Exactive high resolution/accurate  
415 mass spectrometer were used for metabolite detection (**Fig. 1; Step 5**). Controls that  
416 were analyzed in conjunction with the experimental samples included a pooled matrix of  
417 all included samples. Internal and recovery standards were used to assess variability  
418 and to verify performance of extraction and instrumentation, as routinely performed by  
419 Metabolon, Inc.

420         Raw data was extracted using hardware and software developed by Metabolon,  
421 Inc. Metabolites were quantified using area-under-the-curve and identified by  
422 comparison to a library of several thousands of pre-existing entries of purified standards  
423 or recurrent unknown compounds. Each library standard was uniquely authenticated by  
424 retention time/indexes, mass to charge ratios, and chromatographic data. Named  
425 metabolites corresponded to library standards or were predicted with confidence  
426 according to Metabolon, Inc standard protocols.

## 427 **Data Analysis**

428 Following the analytical protocol outlined in (48), we first preprocessed metabolite  
429 abundances for each sample by imputing missing values with half of the lowest  
430 detectable metabolite abundance. Next, we normalized metabolite abundances by  
431 sample features, followed by normalization using metabolite features with log  
432 transformation, centering, and scaling (49). To limit inter-sample variability, metabolite  
433 abundances for each replicate were normalized to sample value for double stranded

434 DNA, protein, or parasite number. To limit inter-metabolite variability, metabolite  
435 abundances were log transformed, centered to median (50), and scaled by standard  
436 deviation (**Fig 1; Step 6**). Resultant processed metabolite abundances were used for  
437 univariate and multivariate statistics, as well as classification. All analyses were  
438 conducted using R (51-59). Welch's t-tests were used to compare group means for  
439 differential abundance determination, assuming unequal variance and normal  
440 distribution, and p-values were adjusted using a false discovery rate. The significance  
441 cutoff is 0.05. See supplementary information for code and detailed analysis.

#### 442 **Microscopy**

443 Laboratory adapted *P. falciparum* clones (BEI Resources, NIAID, NIH: *Plasmodium*  
444 *falciparum*, Strain Patient line E/MRA-1000 or IPC 4884/MRA-1238, contributed by  
445 Didier Ménard) at >50% rings were lysed using 0.15% saponin, as previously described  
446 (46). Samples were washed twice using 1X PBS (Sigma Aldrich, St Louis, MO) and  
447 centrifugation at 2000 x g for 5 minutes. Samples were then stained on slides with either  
448 DAPI at 1:20,000 (Sigma Aldrich, St Louis, MO) and CD235a-PE antibody at 1:100  
449 (Thermo Fisher Scientific, Waltham, MA) for fluorescence microscopy or with Giemsa  
450 stain (Sigma Aldrich, St Louis, MO) for bright field microscopy. Fluorescent images were  
451 acquired using the EVOS FL Cell Imaging System (Thermo Fisher Scientific, Waltham,  
452 MA). Bright field images were acquired using a Nikon Eclipse Ci Upright Microscope  
453 (Nikon, Melville, NY) equipped with a DMK23U274 camera (The Imaging Source,  
454 Charlotte, NC) and NIS Elements Imaging Software (Nikon, Melville, NY).

455

#### 456 **ACKNOWLEDGEMENTS**

457 This project was supported with funding through the National Institute of Allergy and  
458 Infectious Disease R21AI119881 and the University of Virginia CHARGE Enhancement  
459 Fellowship (to JLG). MAC and VC are supported by institutional training grants  
460 (T32GM008136 and T32AI007046, respectively).

461 We would like to thank Dr. Jason Papin and Gregory Medlock, as well as the  
462 members of the Guler, Papin, and Petri labs at the University of Virginia for helpful  
463 discussion and feedback on experimental design and analysis. Additionally, we would  
464 like to thank Michelle Warthan (University of Virginia) for laboratory support, and  
465 Webster Santos (Virginia Tech) and Kevin Lynch (University of Virginia) for antimalarial  
466 synthesis and purification.

467

468

## 469 REFERENCES

- 470 1. **WHO**. 2015. Global Technical Strategy for Malaria 2016–2030. Geneva: World  
471 Health Organization (WHO).
- 472 2. **Carey MA, Papin JA, Guler JL**. 2017. Novel Plasmodium falciparum metabolic  
473 network reconstruction identifies shifts associated with clinical antimalarial  
474 resistance. BMC Genomics **18**:543.
- 475 3. **Allman EL, Painter HJ, Samra J, Carrasquilla M, Llinás M**. 2016. Metabolomic  
476 profiling of the malaria box reveals antimalarial target pathways. Antimicrobial  
477 agents and chemotherapy **60**:6635-6649.
- 478 4. **Babbitt SE, Altenhofen L, Cobbold SA, Istvan ES, Fennell C, Doerig C,  
479 Llinas M, Goldberg DE**. 2012. Plasmodium falciparum responds to amino acid  
480 starvation by entering into a hibernatory state. Proc Natl Acad Sci U S A  
481 **109**:E3278-3287.
- 482 5. **Creek DJ, Chua HH, Cobbold SA, Nijagal B, MacRae JI, Dickerman BK,  
483 Gilson PR, Ralph SA, McConville MJ**. 2016. Metabolomics-Based Screening of  
484 the Malaria Box Reveals both Novel and Established Mechanisms of Action.  
485 Antimicrob Agents Chemother **60**:6650-6663.
- 486 6. **Olszewski KL MJ, Wilinski D, Burns JM, Vaidya AB, Rabinowitz JD, et al. .**  
487 2009. Host-parasite interactions revealed by Plasmodium falciparum  
488 metabolomics. Cell Host Microbe **5**:191-199.
- 489 7. **Park YH, Shi YP, Liang B, Medriano CA, Jeon YH, Torres E, Uppal K,  
490 Slutsker L, Jones DP**. 2015. High-resolution metabolomics to discover potential  
491 parasite-specific biomarkers in a Plasmodium falciparum erythrocytic stage  
492 culture system. Malar J **14**:122.
- 493 8. **Parvazi S, Sadeghi S, Azadi M, Mohammadi M, Arjmand M, Vahabi F,  
494 Sadeghzadeh S, Zamani Z**. 2016. The Effect of Aqueous Extract of Cinnamon  
495 on the Metabolome of Plasmodium falciparum Using 1HNMR Spectroscopy.  
496 Journal of Tropical Medicine **2016**:5.
- 497 9. **Sana TR, Gordon DB, Fischer SM, Tichy SE, Kitagawa N, Lai C, Gosnell WL,  
498 Chang SP**. 2013. Global Mass Spectrometry Based Metabolomics Profiling of  
499 Erythrocytes Infected with Plasmodium falciparum. PLOS ONE **8**:e60840.
- 500 10. **Sengupta A, Ghosh S, Das BK, Panda A, Tripathy R, Pied S, Ravindran B,  
501 Pathak S, Sharma S, Sonawat HM**. 2016. Host metabolic responses to  
502 Plasmodium falciparum infections evaluated by 1H NMR metabolomics. Mol  
503 Biosyst **12**:3324-3332.
- 504 11. **Teng R, Lehane AM, Winterberg M, Shafik SH, Summers RL, Martin RE, van  
505 Schalkwyk DA, Junankar PR, Kirk K**. 2014. 1H-NMR metabolite profiles of  
506 different strains of Plasmodium falciparum. Bioscience reports **34**:e00150.
- 507 12. **Siddiqui G, Srivastava A, Russell AS, Creek DJ**. 2017. Multi-omics Based  
508 Identification of Specific Biochemical Changes Associated With PfKelch13-  
509 Mutant Artemisinin-Resistant Plasmodium falciparum. The Journal of Infectious  
510 Diseases **215**:1435-1444.
- 511 13. **Park YH, Shi YP, Liang B, Medriano CAD, Jeon YH, Torres E, Uppal K,  
512 Slutsker L, Jones DP**. 2015. High-resolution metabolomics to discover potential  
513 parasite-specific biomarkers in a Plasmodium falciparum erythrocytic stage

- 514 culture system. *Malaria Journal* **14**:122.
- 515 14. **Trager W, Jensen JB.** 1976. Human malaria parasites in continuous culture.  
516 *Science* **193**.
- 517 15. **WHO.** 2015. Guidelines for the treatment of malaria, 3rd ed. Geneva: World  
518 Health Organization (WHO).
- 519 16. **Langreth SG, Jensen JB, Reese RT, Trager W.** 1978. Fine structure of human  
520 malaria in vitro. *J Protozool* **25**:443-452.
- 521 17. **Canham PB, Burton AC.** 1968. Distribution of size and shape in populations of  
522 normal human red cells. *Circ Res* **22**:405-422.
- 523 18. **Paul F, Roath S, Melville D, Warhurst DC, Osisanya JOS.** 1981.  
524 SEPARATION OF MALARIA-INFECTED ERYTHROCYTES FROM WHOLE  
525 BLOOD: USE OF A SELECTIVE HIGH-GRADIENT MAGNETIC SEPARATION  
526 TECHNIQUE. *The Lancet* **318**:70-71.
- 527 19. **Francis SE, Sullivan Jr DJ, Goldberg, E D.** 1997. Hemoglobin metabolism in  
528 the malaria parasite *Plasmodium falciparum*. *Annual Reviews in Microbiology*  
529 **51**:97-123.
- 530 20. **de Rojas MO, Wasserman M.** 1985. Temporal relationships on macromolecular  
531 synthesis during the asexual cell cycle of *Plasmodium falciparum*. *Trans R Soc*  
532 *Trop Med Hyg* **79**:792-796.
- 533 21. **Foth BJ, Zhang N, Chaal BK, Sze SK, Preiser PR, Bozdech Z.** 2011.  
534 Quantitative time-course profiling of parasite and host cell proteins in the human  
535 malaria parasite *Plasmodium falciparum*. *Mol Cell Proteomics* **10**:M110.006411.
- 536 22. **Jackson KE, Spielmann T, Hanssen E, Adisa A, Separovic F, Dixon MW,**  
537 **Trenholme KR, Hawthorne PL, Gardiner DL, Gilberger T, Tilley L.** 2007.  
538 Selective permeabilization of the host cell membrane of *Plasmodium falciparum*-  
539 infected red blood cells with streptolysin O and equinatoxin II. *Biochem J*  
540 **403**:167-175.
- 541 23. **van den Berg RA, Hoefsloot HC, Westerhuis JA, Smilde AK, van der Werf**  
542 **MJ.** 2006. Centering, scaling, and transformations: improving the biological  
543 information content of metabolomics data. *BMC Genomics* **7**:142.
- 544 24. **Kohl SM, Klein MS, Hochrein J, Oefner PJ, Spang R, Gronwald W.** 2012.  
545 State-of-the art data normalization methods improve NMR-based metabolomic  
546 analysis. *Metabolomics* **8**:146-160.
- 547 25. **Ejigu BA, Valkenburg D, Baggerman G, Vanaerschot M, Witters E, Dujardin**  
548 **JC, Burzykowski T, Berg M.** 2013. Evaluation of normalization methods to pave  
549 the way towards large-scale LC-MS-based metabolomics profiling experiments.  
550 *OMICS* **17**:473-485.
- 551 26. **Hoffmann R, Seidl T, Dugas M.** 2002. Profound effect of normalization on  
552 detection of differentially expressed genes in oligonucleotide microarray data  
553 analysis. *Genome Biology* **3**:research0033.0031.
- 554 27. **Babbitt SE, Altenhofen L, Cobbold SA, Istvan ES, Fennell C, Doerig C.** 2012.  
555 *Plasmodium falciparum* responds to amino acid starvation by entering into a  
556 hibernatory state. *Proc Natl Acad Sci U S A* **109**.
- 557 28. **Silva AM, Cordeiro-da-Silva A, Coombs GH.** 2011. Metabolic variation during  
558 development in culture of *Leishmania donovani* promastigotes. *PLoS Negl Trop*  
559 *Dis* **5**:e1451.

- 560 29. **Silva LP, Lorenzi PL, Purwaha P, Yong V, Hawke DH, Weinstein JN.** 2013.  
561 Measurement of DNA concentration as a normalization strategy for metabolomic  
562 data from adherent cell lines. *Analytical chemistry* **85**:10.1021/ac401559v.
- 563 30. **Rijpma SR, van der Velden M, Bilos A, Jansen RS, Mahakena S, Russel FG,**  
564 **Sauerwein RW, van de Wetering K, Koenderink JB.** 2016. MRP1 mediates  
565 folate transport and antifolate sensitivity in *Plasmodium falciparum*. *FEBS Lett*  
566 **590**:482-492.
- 567 31. **Olszewski KL.** 2009. Host-parasite interactions revealed by plasmodium  
568 *falciparum* metabolomics. *Cell Host Microbe* **5**.
- 569 32. **Sana TR, Gordon DB, Fischer SM, Tichy SE, Kitagawa N, Lai C.** 2013. Global  
570 mass spectrometry based metabolomics profiling of erythrocytes infected with  
571 *Plasmodium falciparum*. *PLoS One* **8**.
- 572 33. **Teng R, Lehane AM, Winterberg M, Shafik SH, Summers RL, Martin RE.**  
573 2014. 1H-NMR metabolite profiles of different strains of *Plasmodium falciparum*.  
574 *Biosci Rep* **34**.
- 575 34. **Olszewski KL, Mather MW, Morrissey JM, Garcia BA, Vaidya AB, Rabinowitz**  
576 **JD, Llinas M.** 2013. Retraction: Branched tricarboxylic acid metabolism in  
577 *Plasmodium falciparum*. *Nature* **497**:652.
- 578 35. **Whaun JM, Rittershaus C, Ip SH.** 1983. Rapid identification and detection of  
579 parasitized human red cells by automated flow cytometry. *Cytometry* **4**:117-122.
- 580 36. **Margos G, Bannister LH, Dluzewski AR, Hopkins J, Williams IT, Mitchell GH.**  
581 2004. Correlation of structural development and differential expression of  
582 invasion-related molecules in schizonts of *Plasmodium falciparum*. *Parasitology*  
583 **129**:273-287.
- 584 37. **Ribaut C, Berry A, Chevalley S, Reybier K, Morlais I, Parzy D, Nepveu F,**  
585 **Benoit-Vical F, Valentin A.** 2008. Concentration and purification by magnetic  
586 separation of the erythrocytic stages of all human *Plasmodium* species. *Malaria*  
587 *Journal* **7**:45.
- 588 38. **Rojo D, Canuto GA, Castilho-Martins EA, Tavares MF, Barbas C, Lopez-**  
589 **Gonzalez A, Rivas L.** 2015. A Multiplatform Metabolomic Approach to the  
590 Basis of Antimonial Action and Resistance in *Leishmania infantum*. *PLoS One*  
591 **10**:e0130675.
- 592 39. **Westrop GD, Williams RA, Wang L, Zhang T, Watson DG, Silva AM, Coombs**  
593 **GH.** 2015. Metabolomic Analyses of *Leishmania* Reveal Multiple Species  
594 Differences and Large Differences in Amino Acid Metabolism. *PLoS One*  
595 **10**:e0136891.
- 596 40. **Akpunarlieva S, Weidt S, Lamasudin D, Naula C, Henderson D, Barrett M,**  
597 **Burgess K, Burchmore R.** 2017. Integration of proteomics and metabolomics to  
598 elucidate metabolic adaptation in *Leishmania*. *J Proteomics* **155**:85-98.
- 599 41. **Wang Y, Liu H, McKenzie G, Witting PK, Stasch J-P, Hahn M,**  
600 **Changsirivathanathamrong D, Wu BJ, Ball HJ, Thomas SR, Kapoor V,**  
601 **Celermajer DS, Mellor AL, Keaney JF, Hunt NH, Stocker R.** 2010. Kynurenine  
602 is an endothelium-derived relaxing factor produced during inflammation. *Nat Med*  
603 **16**:279-285.
- 604 42. **Hartai Z, Klivenyi P, Janaky T, Penke B, Dux L, Vecsei L.** 2005. Kynurenine  
605 metabolism in plasma and in red blood cells in Parkinson's disease. *J Neurol Sci*



- 606 **239:31-35.**
- 607 43. **Wunderlich F, Fiebig S, Vial H, Kleinig H.** 1991. Distinct lipid compositions of  
608 parasite and host cell plasma membranes from Plasmodium chabaudi-infected  
609 erythrocytes. *Mol Biochem Parasitol* **44:271-277.**
- 610 44. **Gulati S, Ekland EH, Ruggles KV, Chan RB, Jayabalasingham B, Zhou B,**  
611 **Mantel P-Y, Lee MCS, Spottiswoode N, Coburn-Flynn O, Hjelmqvist D,**  
612 **Worgall TS, Marti M, Di Paolo G, Fidock DA.** 2015. Profiling the Essential  
613 Nature of Lipid Metabolism in Asexual Blood and Gametocyte Stages of  
614 Plasmodium falciparum. *Cell host & microbe* **18:371-381.**
- 615 45. **Lambros C, Vanderberg JP.** 1979. Synchronization of Plasmodium falciparum  
616 erythrocytic stages in culture. *The Journal of parasitology*:418-420.
- 617 46. **Doolan DL.** 2002. *Malaria Methods and Protocols*, vol 72. Humana Press.
- 618 47. **Bei AK, Desimone TM, Badiane AS, Ahoundi AD, Dieye T, Ndiaye D, Sarr O,**  
619 **Ndir O, Mboup S, Duraisingh MT.** 2010. A flow cytometry-based assay for  
620 measuring invasion of red blood cells by Plasmodium falciparum. *Am J Hematol*  
621 **85:234-237.**
- 622 48. **Xia J, Wishart DS.** 2011. Web-based inference of biological patterns, functions  
623 and pathways from metabolomic data using MetaboAnalyst. *Nat Protocols* **6:743-**  
624 **760.**
- 625 49. **Sugimoto M, Kawakami M, Robert M, Soga T, Tomita M.** 2012. Bioinformatics  
626 Tools for Mass Spectroscopy-Based Metabolomic Data Processing and Analysis.  
627 *Curr Bioinform* **7:96-108.**
- 628 50. **Evans AM, DeHaven CD, Barrett T, Mitchell M, Milgram E.** 2009. Integrated,  
629 nontargeted ultrahigh performance liquid chromatography/electrospray ionization  
630 tandem mass spectrometry platform for the identification and relative  
631 quantification of the small-molecule complement of biological systems. *Anal*  
632 *Chem* **81:6656-6667.**
- 633 51. **Borchers HW.** 2015. Pracma: practical numerical math functions. R package  
634 version 1.8. 3.
- 635 52. **Champely S.** 2012. pwr: Basic functions for power analysis. R package version  
636 **1.**
- 637 53. **Kuhn M.** 2015. Caret: classification and regression training. Astrophysics Source  
638 Code Library.
- 639 54. **Liaw A, Wiener M.** 2002. Classification and regression by randomForest. *R*  
640 *news* **2:18-22.**
- 641 55. **Meyer D, Dimitriadou E, Hornik K, Weingessel A, Leisch F.** 2015. e1071:  
642 Misc Functions of the Department of Statistics, Probability Theory Group  
643 (Formerly: E1071), TU Wien, 2015. R package version:1-6.
- 644 56. **Scherer R, Scherer MR.** 2016. Package 'samplesize'.
- 645 57. **Team RC.** 2014. *R: A language and environment for statistical computing.*  
646 Vienna, Austria: R Foundation for Statistical Computing; 2014.
- 647 58. **Wickham H.** 2007. Reshaping data with the reshape package. *Journal of*  
648 *Statistical Software* **21:1-20.**
- 649 59. **Wickham H.** 2016. tidyverse: Easily install and load 'tidyverse' packages  
650 [Software].  
651

652 **TABLES AND FIGURE**

653 Table 1. **Parameters in metabolomics analysis of intracellular parasites, including**  
 654 ***Plasmodium***. Note: most parameters do not have strict recommendations, as they are  
 655 dependent on experimental design. Grey highlights indicate methods that were  
 656 employed and evaluated during this study.

| Parameter                   | Options                                           | Factors to consider                                                                                                                                                    |
|-----------------------------|---------------------------------------------------|------------------------------------------------------------------------------------------------------------------------------------------------------------------------|
| Growth conditions           | Ring stage                                        | -Limited biomass (1-2µm, <b>Fig. 2A and 3A</b> ), haploid genome<br>-Few enrichment options                                                                            |
|                             | Late stage                                        | -Larger in size (3-10µm, <b>Fig. 2A</b> ), polyploid genome<br>-Can use magnetic enrichment ( <b>Fig. 1</b> )                                                          |
|                             | Mixed stages                                      | -Effects of stage variation on data                                                                                                                                    |
|                             | Media batches                                     | -Relevant if using serum-based media formulations                                                                                                                      |
| Additional controls         | Blood batches                                     | -Must be recorded and ideally matched within comparisons ( <b>Table S1</b> )<br>-Useful to assess host contamination levels ( <b>Fig. 3D</b> )                         |
|                             | Uninfected erythrocytes                           | -Use to identify host metabolites<br>-Does not replace normalization                                                                                                   |
| Enrichment methods          | Saponin, other lytic reagents                     | -Compatible with all stages ( <b>Fig. 1</b> )<br>-Parasites remain in ghosts ( <b>Fig. 3C</b> )<br>- <i>Need improved methods that isolate parasite from host cell</i> |
|                             | Magnetic purification                             | -Increases parasite to host ratio ( <b>Fig. 1</b> )                                                                                                                    |
| Metabolite Detection        | NMR                                               | -Limited metabolite detection but higher confidence                                                                                                                    |
|                             | Mass Spectrometry                                 | -Industry standard for broad detection                                                                                                                                 |
| Pre-analysis normalization  | Cell number normalization                         | -Can be combined with any post-analysis normalization but requires sample manipulation                                                                                 |
| Post-analysis normalization | Parasite-derived parameters                       | -Selection requires knowledge of experimental design (i.e. parasite number or DNA amount)                                                                              |
|                             | Parameters with mixed derivation (host, parasite) | -Can fail to remove undesired noise ( <b>Fig. 2</b> )                                                                                                                  |
|                             | Internal standards                                | -Dependent on metabolomics facilities                                                                                                                                  |
| Centering                   | Mean                                              | -Standard centering                                                                                                                                                    |
|                             | Median                                            | -Less sensitive to outliers                                                                                                                                            |
|                             | Other                                             | -See (23) for summary of alternative approaches                                                                                                                        |
| Scaling                     | Within group SD                                   | -Requires no additional samples                                                                                                                                        |
|                             | Z-scoring                                         | -Requires control samples (can use uninfected erythrocytes)                                                                                                            |
| Statistical analysis        | Univariate                                        | -Requires multiple comparison corrections                                                                                                                              |
|                             | Multivariate                                      | -Reveals group differences based on multiple variables                                                                                                                 |
|                             | Machine learning (Random Forest)                  | -Classification is more stringent than univariate tests, but can identify nonlinear effects                                                                            |

657

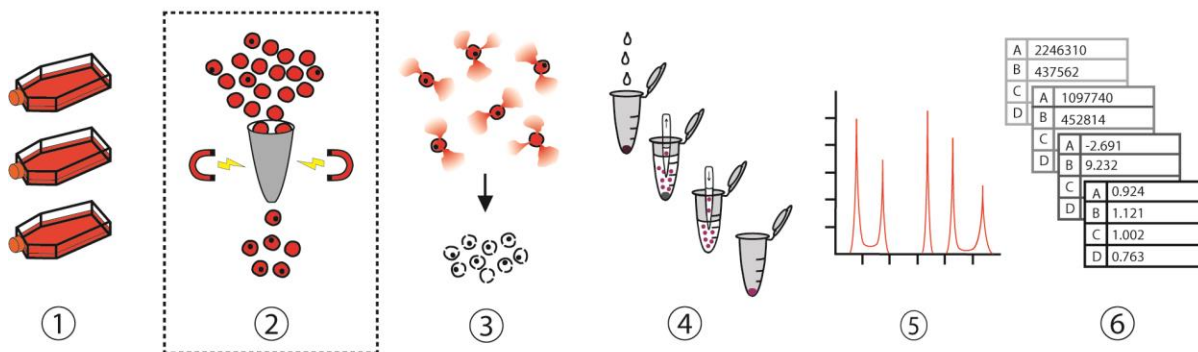

658

659 **Figure 1. Metabolite purification and analysis pipeline.** 1) Laboratory-adapted *P.*  
 660 *falciparum* clones are cultured in host erythrocytes. 2) If enrichment of late stage  
 661 parasites is desired (dotted line), cultures can be passed through a magnetic column to  
 662 retain paramagnetic late stage-infected erythrocytes (black dots inside red circles).  
 663 Samples for parasite count determination were collected at steps 1 and 2, depending on  
 664 the sample group (see *Materials and Methods*). 3) Erythrocytes (infected and  
 665 uninfected) are lysed using saponin, but parasites remain intact (black dots). Wash  
 666 steps are used to remove hemoglobin and other intracellular erythrocyte contents (red  
 667 material). Samples for total protein determination were collected at this step. 4) Soluble  
 668 metabolites (purple dots) are extracted from precipitated protein (grey pellet) using  
 669 methanol (droplets). Samples for DNA content determination were taken at this step,  
 670 prior to methanol extraction. 5) Metabolites are detected by liquid chromatography  
 671 followed by mass spectroscopy. Metabolites are identified by comparison to a library of  
 672 authenticated standards. 6) Abundance data for each metabolite is normalized to an  
 673 appropriate parameter (i.e. DNA content or parasite number), log transformed, centered  
 674 to median, and scaled to variance, prior to employing statistical comparisons.

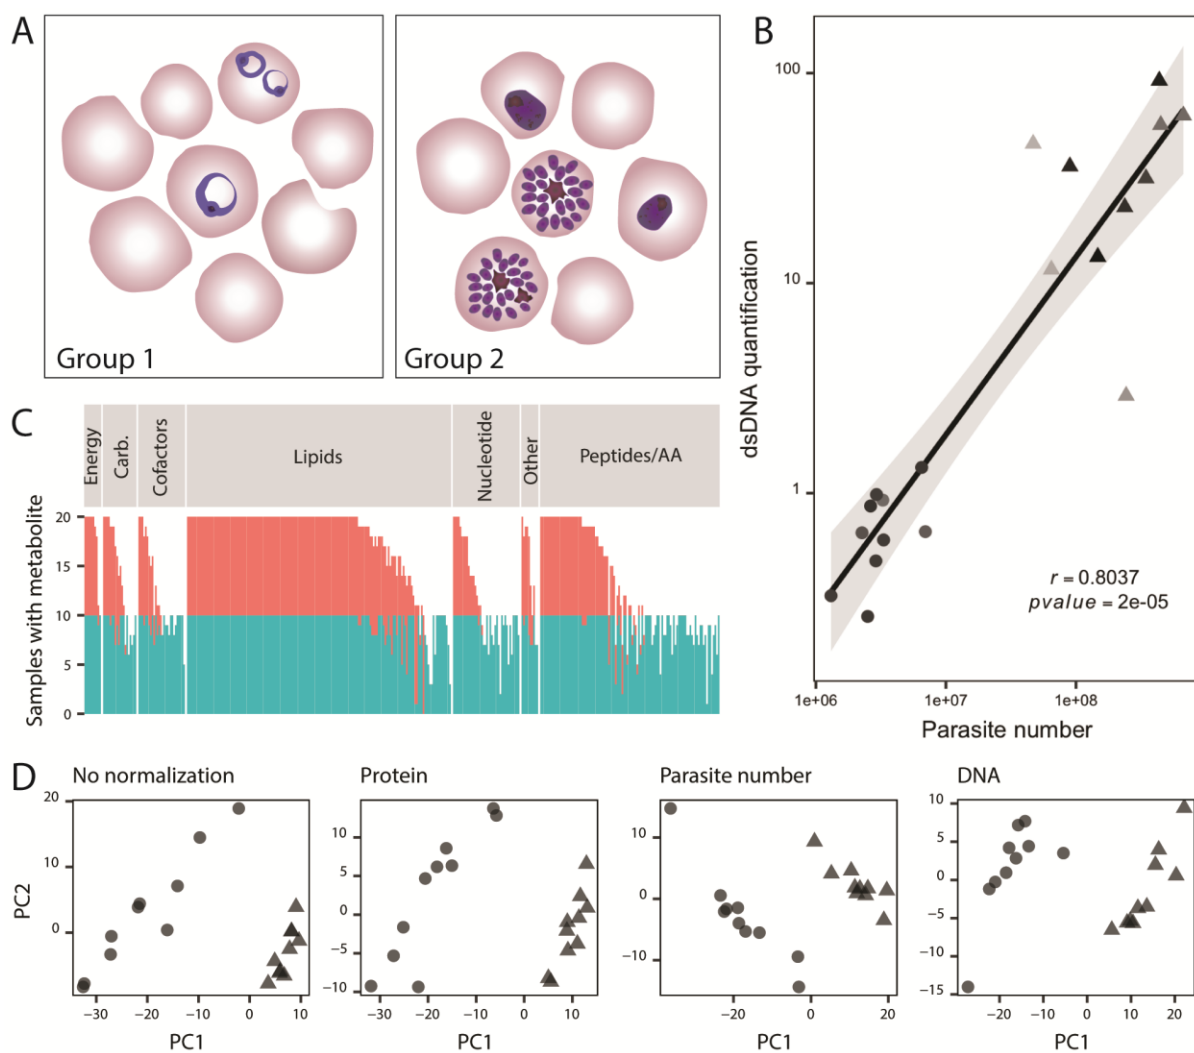

675 **Figure 2. Comparison 1: Metabolomes are distinct and influenced by**  
676 **normalization approach. A. Comparison made throughout Figure 2. Group 1**  
677 **contains ten samples of early-stage parasites grown in AlbuMAX-based media in three**  
678 **blood batches, treated with antimalarial (see *Materials and Methods* and **Table S1**).**  
679 **These parasites were isolated at a low parasitemia and purified from host material using**  
680 **saponin lysis. Group 2 contains ten samples of late-stage parasites grown in a human**  
681 **serum-based media in four blood batches, treated with antimalarial (see *Materials and***  
682 ***Methods* and **Table S1**). Group 2 parasites were purified magnetically to achieve high**  
683 **parasitemia and lysed from host cells with saponin. B. Sample characteristics.**

684 Samples (group 1 in circles and group 2 in triangles) were evaluated for DNA, parasite  
685 count, and protein amount prior to analysis. **C. Summary of detected metabolites.** Not  
686 all metabolites were detected in each sample. The majority of metabolites detected  
687 were lipid species. Sample groups are color coded with group 1 in red and group 2 in  
688 blue. A full list of identified metabolites are listed in supplemental data (see Github). **D.**  
689 **Normalization affects measured metabolome.** Principle component (PC) analysis  
690 was performed prior to normalization (left), as well as using three different normalization  
691 methods (left to right, total protein, parasite number, and DNA). Circles indicate group 1  
692 samples and triangles indicate group 2 samples. For PC decompositions, see **Table S2.**  
693

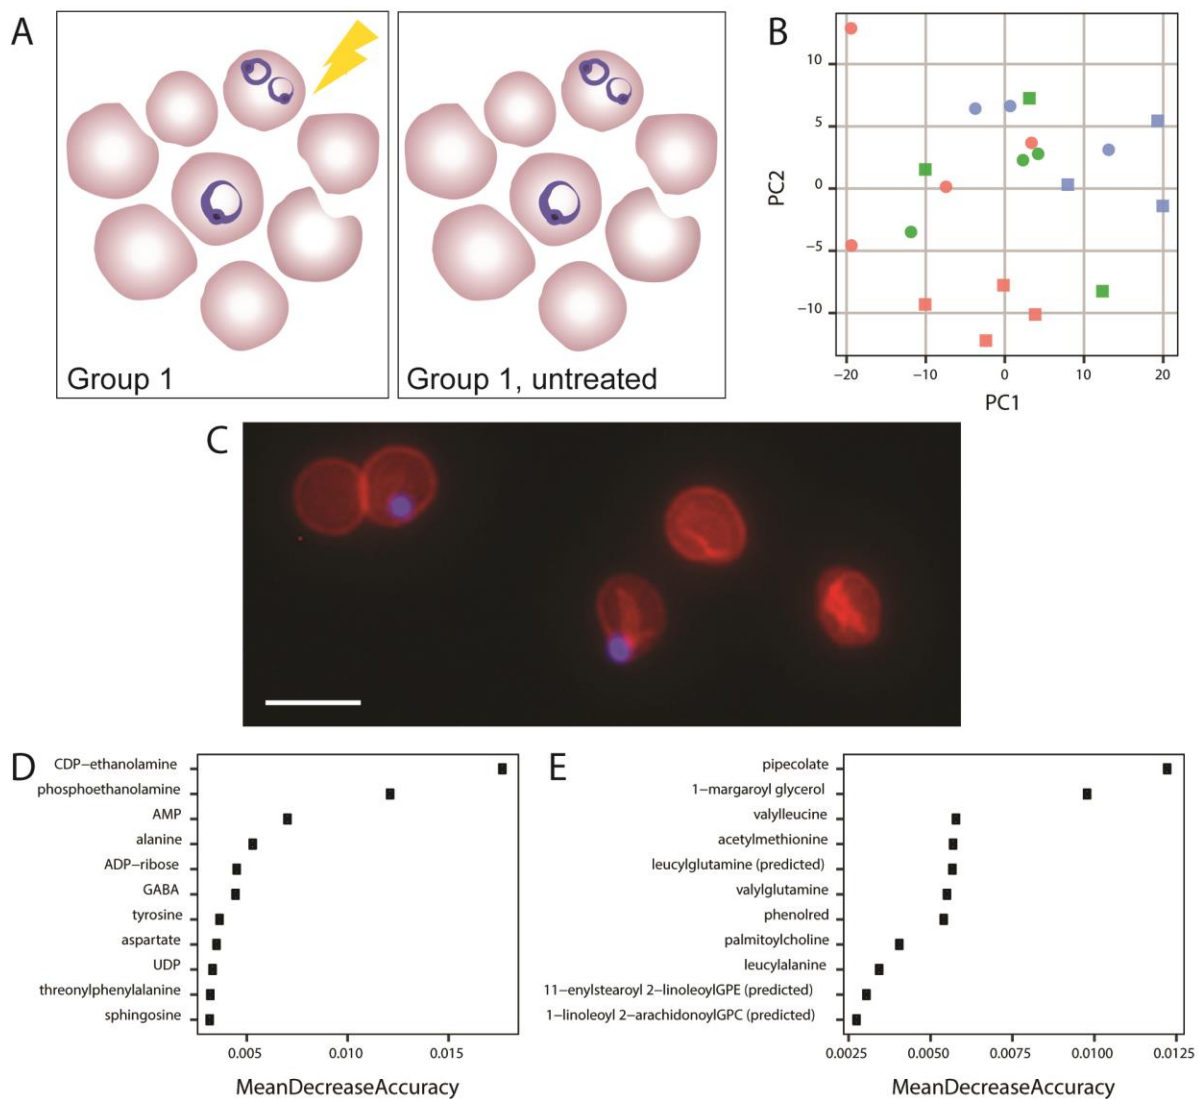

694 **Figure 3. Comparison 2: Blood batch and antimalarial treatment influence**  
 695 **metabolomes. A. Comparison made throughout Figure 3.** All samples were grown in  
 696 AlbuMAX-based media in three blood batches and purified from host material using  
 697 saponin lysis during the early stage. Group 1 was treated with antimalarial for 6 hours  
 698 and group 1, untreated, did not undergo treatment (see **Table S1**); samples were  
 699 matched for blood batch. **B. Metabolome principle component analysis.** PCA of  
 700 DNA normalized, median-centered metabolomes of early stage parasites from

701 Comparison 2. Squares indicate antimalarial treated samples and triangles indicate  
702 untreated samples. Blood batches are indicated by color. **C. Visualization of**  
703 **erythrocyte ghosts containing parasites.** Fluorescent imaging (40X) reveals  
704 parasites (blue, DAPI) retained within erythrocyte ghosts (red, phycoerythrin conjugated  
705 CD235a antibody) following saponin treatment. Scale bar represents 10 $\mu$ m. **D.**  
706 **Metabolites predictive of blood batch.** Top ten most predictive variables in the blood  
707 batch Random Forest classifier. **E. Metabolites predictive of antimalarial treatment.**  
708 Top ten most predictive variables in the antimalarial treatment Random Forest classifier.
